# Supplementary material
Source: publisher figshare collection journal article supplement (https://future-science-group.figshare.com/ndownloader/files/35653976)
Supplement: Supplementary file 1 [file 35653976]

# New 1,3,4-thiadiazoles derivatives: Synthesis, antiproliferative activity, molecular docking, and molecular dynamics

Abdoullah Bimoussa1, *, Ali Oubellab 1, Fatima Zahra Bamou 2, Zein Alabdeen Khdar 2, Mourad Fawzi 1, Yassine Laamari 1, My Youssef Ait Itto 1, *, Hamid Morjani 3,

Aziz Auhmani1, *.

1-Laboratory of Organic Synthesis and Physico-Molecular Chemistry, Department of Chemistry, Faculty of Sciences Semlalia, B.P. 2390, Marrakesh 40001, Morocco.

2- Institute of Pharmaceutical Chemistry, University of Szeged, Interdisciplinary excellent center, H-6720 Szeged, Eötvös utca 6, Hungary.

3-BioSpectroscopie Translationnelle, BioSpecT - EA7506, UFR de Pharmacie, Université de Reims Champagne-Ardenne, 51 Rue Cognacq Jay, 51096, Reims Cedex, France.

**Spectral data for compound 1**


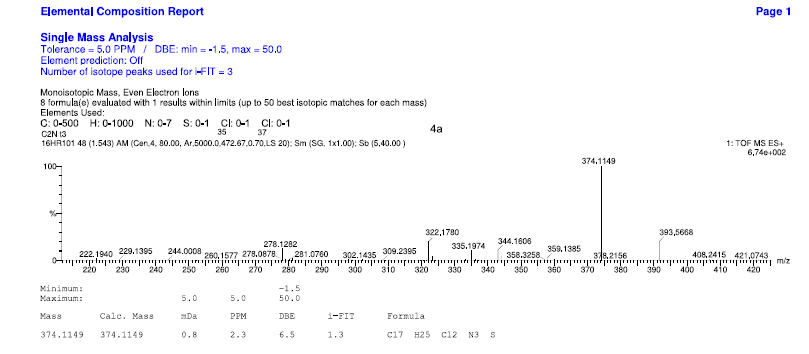


**Spectral data for compound 4a**

NMR Spectroscopy (300 MHz, CDCl3)

13C Decoupled spectrum APT


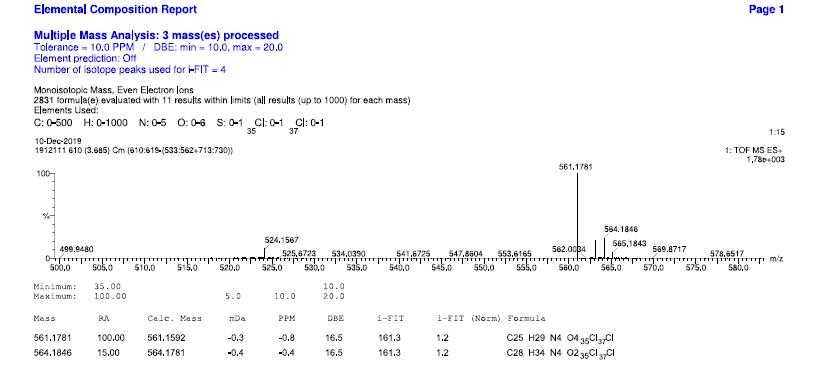
 HRMS spectrum

**Spectral data for compound 4b**

NMR Spectroscopy (300 MHz, CDCl3)

13C Decoupled spectrum APT


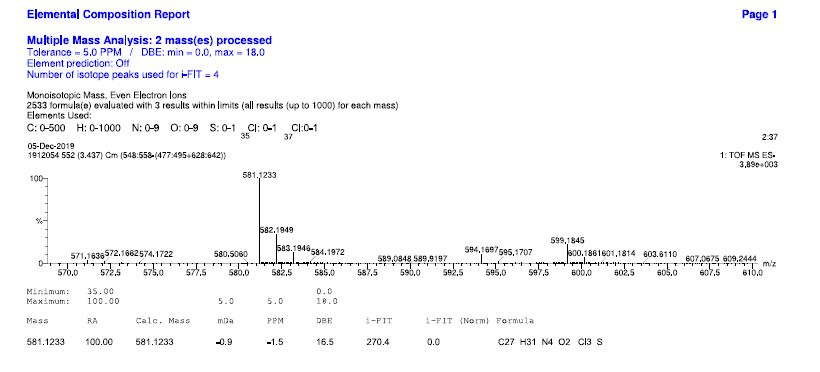


HRMS spectrum

**Spectral data for compound 4c**

NMR Spectroscopy (300 MHz, CDCl3)

13C Decoupled spectrum APT


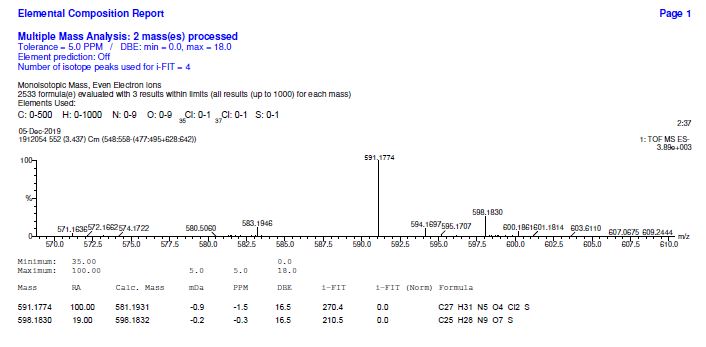


HRMS spectrum

**Spectral data for compound 5a**

NMR Spectroscopy (300 MHz, CDCl3)

13C Decoupled spectrum APT


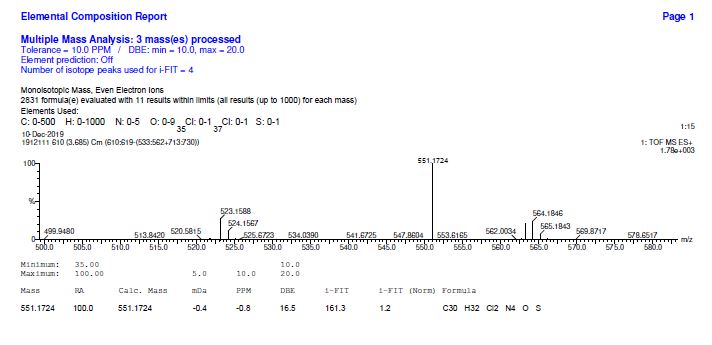
 HRMS spectrum

**Spectral data for compound 5b**

NMR Spectroscopy (300 MHz, CDCl3)

13C Decoupled spectrum APT


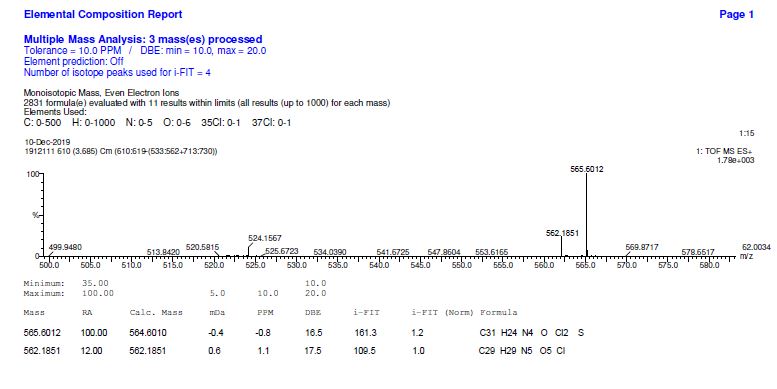


HRMS spectrum

**Spectral data for compound 5c**

NMR Spectroscopy (300 MHz, CDCl3)

13C Decoupled spectrum APT


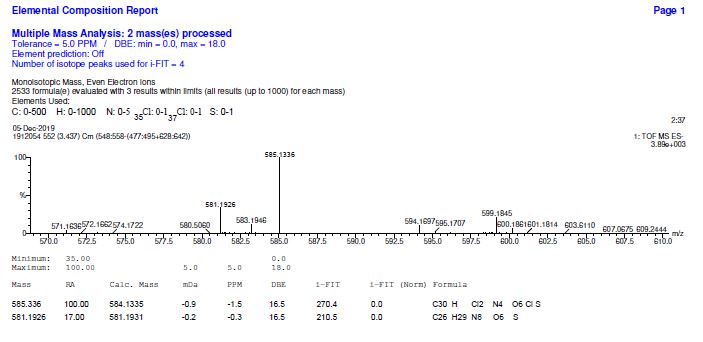


HRMS spectrum

**Spectral data for compound 5d**


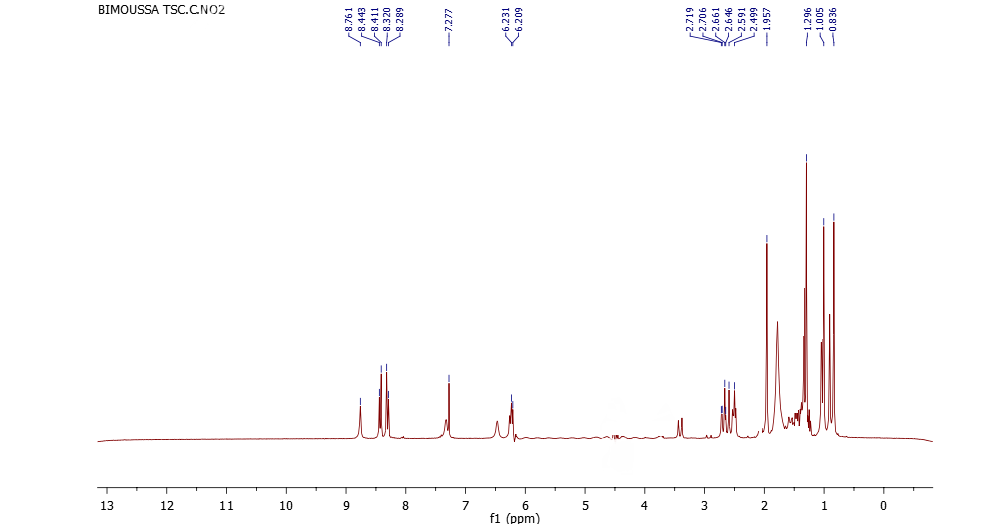


NMR Spectroscopy (300 MHz, CDCl3)

13C Decoupled spectrum APT


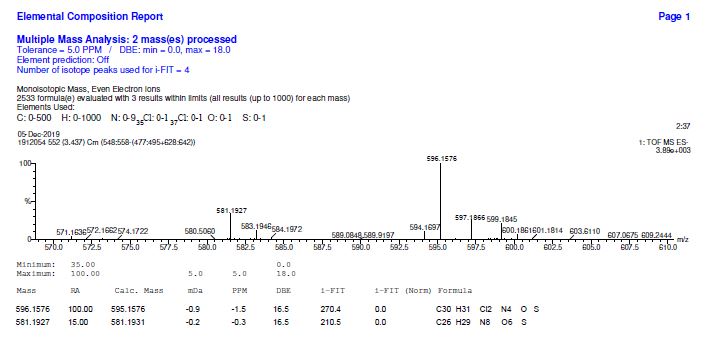


HRMS spectrum
